# Supplementary material for: Hydrothermal synthesis of Auricularia auricula derived nitrogen, phosphorus-doped carbon dots and application in Ag(i) and 4-nitrophenol detection and bioimaging
Source: Royal Society of Chemistry journal article supplement (doi:10.1039/d0ay00316f), 2020-01-01
Supplement: d0ay00316f1.pdf [file d0ay00316f1.pdf]

# Hydrothermal synthesis of *Auricularia auricula* Derived Nitrogen, Phosphorus-doped Carbon Dots and Application in Ag(I), 4-Nitrophenol Detection and Bioimaging

Yujiao Tu,<sup>#a</sup> Suping Wang,<sup>#b</sup> Xiaotian Yuan,<sup>b</sup> Pengfei Song,<sup>b</sup> Yunlin Wei,<sup>b</sup> Kunhao Qin,<sup>b</sup> Qi Zhang,<sup>b</sup> Xiuling Ji <sup>\*b</sup>

---

<sup>a</sup>. Department of Chemical Science and Technology, Kunming University, Kunming, 650214, China.

<sup>b</sup>. Faculty of Life Science and Technology, Kunming University of Science and Technology, Kunming 650500, China

<sup>c</sup>. Faculty Technology Center of Yunnan Tobacco Industry Co., Ltd. Kunming, Yunnan, China, 650053

#. These authors have contributed equally to this work.

\*. Corresponding author.

Table S1 Effects of different reaction times and reaction temperature on the quantum yields of *Aa* N,P-CDs

| Temperature (°C)<br>Time (h) | 160  | 180  | 200  | 220  | 240  |
|------------------------------|------|------|------|------|------|
|                              |      |      |      |      |      |
| 2                            | 1.28 | 1.44 | 1.68 | 1.71 | 1.76 |
| 6                            | 1.81 | 2.03 | 2.20 | 2.43 | 2.61 |
| 8                            | 2.42 | 2.41 | 5.19 | 5.38 | 5.62 |
| 12                           | 3.66 | 3.72 | 7.25 | 6.53 | 5.64 |
| 24                           | 4.08 | 4.83 | 6.31 | 5.84 | 4.71 |

Table S2 Park equation of 4-NP detection by *Aa* N,P-CDs

| 4-NP concentration(μM) | <i>A<sub>ex</sub></i> | <i>A<sub>em</sub></i> | <i>F<sub>cor</sub>/F<sub>obsd</sub></i> |
|------------------------|-----------------------|-----------------------|-----------------------------------------|
| 0                      | 0.266                 | 0.088                 | 1.482                                   |
| 5                      | 0.319                 | 0.095                 | 1.530                                   |
| 10                     | 0.376                 | 0.103                 | 1.624                                   |
| 15                     | 0.393                 | 0.097                 | 1.683                                   |
| 20                     | 0.439                 | 0.103                 | 1.709                                   |
| 25                     | 0.484                 | 0.105                 | 1.753                                   |

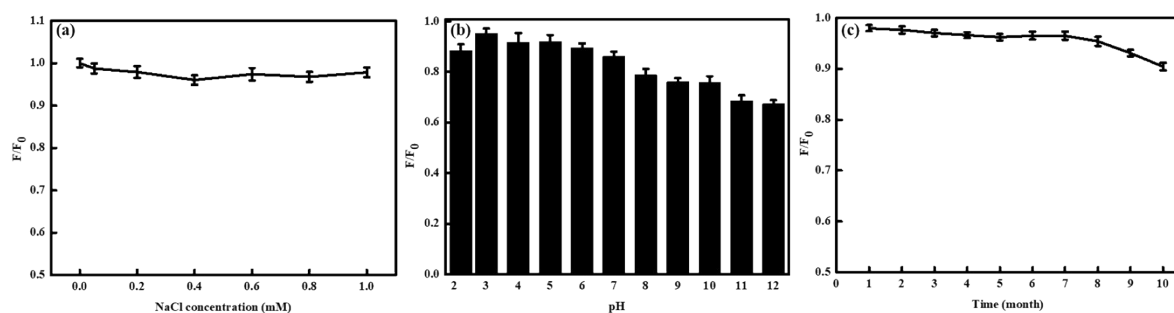

Fig. S1 Fluorescence intensity of *Aa* N,P-CDs at different NaCl concentrations ranging from 0 to 1 M (a), pH value from 2.2 to 12 (b) and time (c)

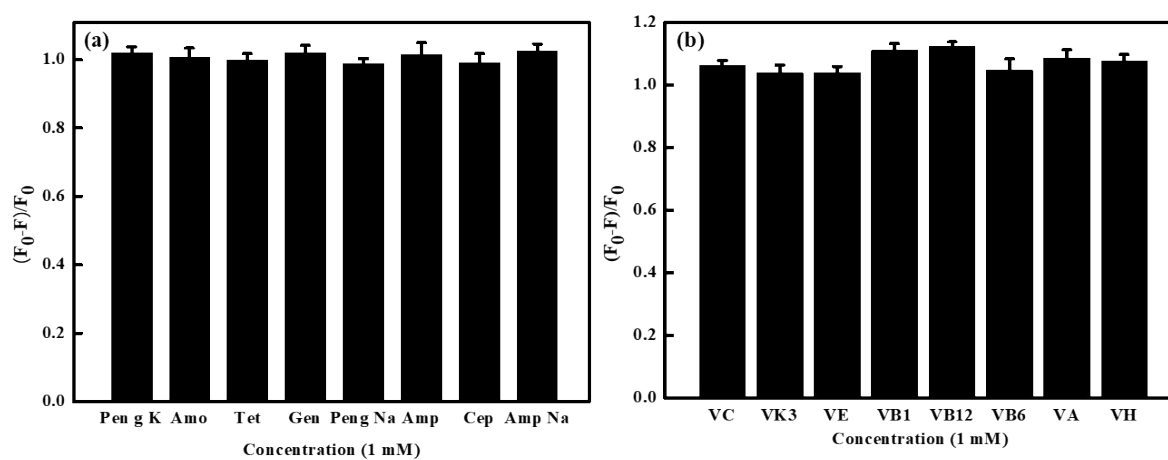

Fig. S2 Fluorescence quenching efficiency of antibiotics (a) and vitamins (b) to the *Aa* N,P-CDs

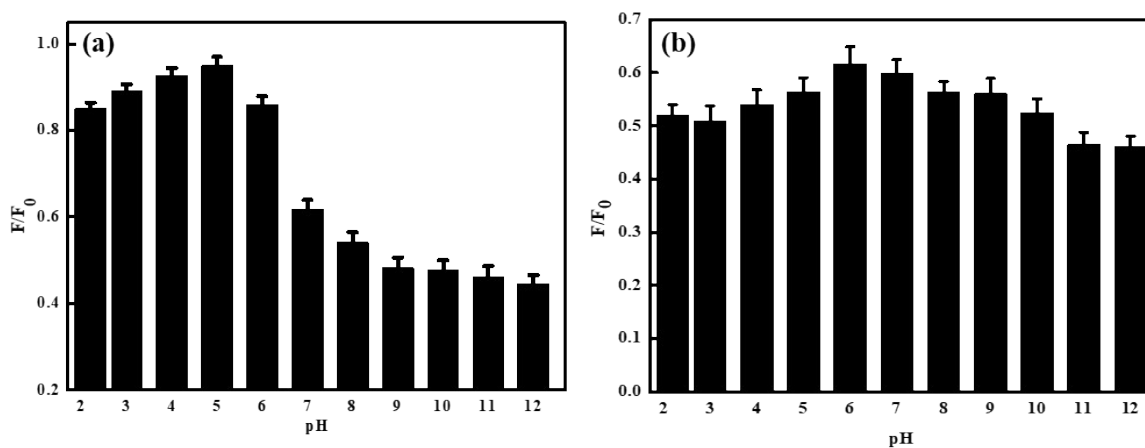

Fig. S3 Effect of sample pH value on the detection of 4-NP (a) and Ag(I) (b)

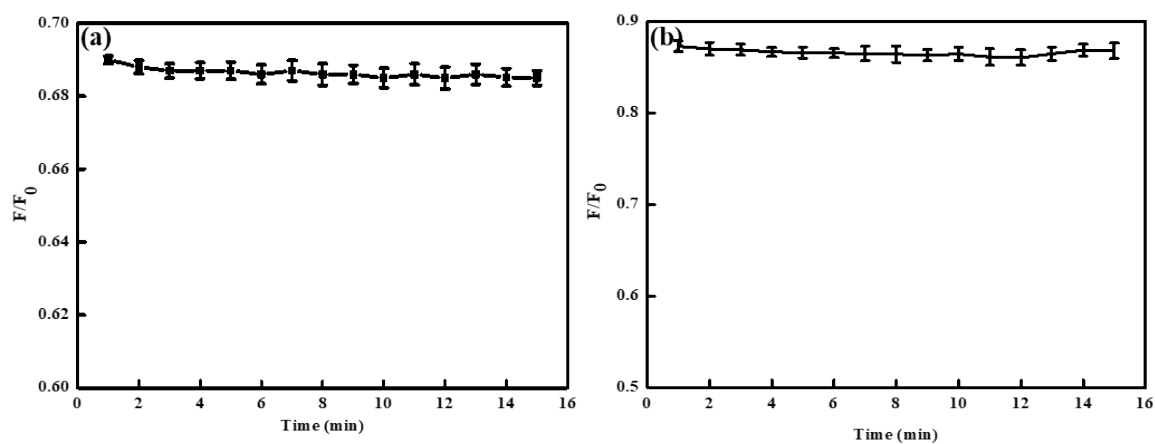

Fig. S4 Effect of reaction time on the detection of 4-NP (a) and Ag(I) (b)

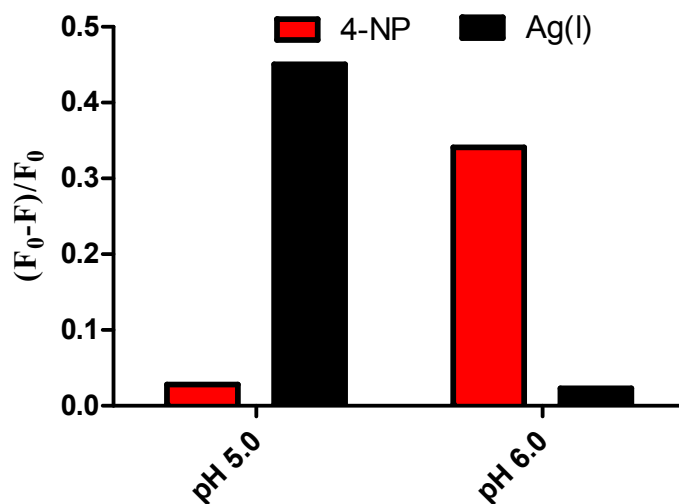

Fig. S5 Simultaneous detection of 4-NP and Ag(I) with the prepared Aa N,P-CDs at different pH value

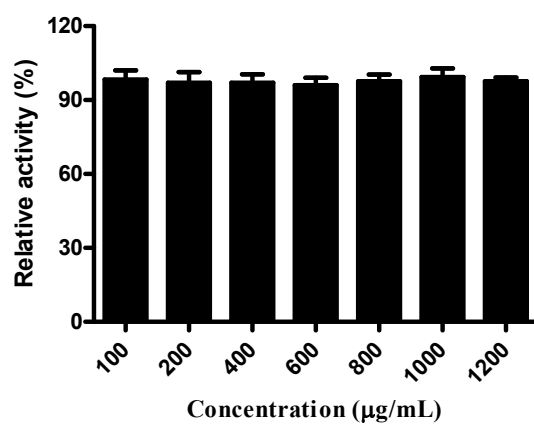

Fig. S6 U2OS cell viability from MTT assays with different Aa N,P-CDs concentration after 24 h incubation
